# Supplementary material for: 2D MoS2/polyaniline heterostructures with enlarged interlayer spacing for superior lithium and sodium storage
Source: Royal Society of Chemistry journal article supplement (doi:10.1039/c7ta00030h), 2017-01-01
Supplement: c7ta00030h1.pdf [file c7ta00030h1.pdf]

## **Electronic Supplementary Information**

### **2D MoS<sub>2</sub>/Polyaniline Heterostructures with Enlarged Interlayer Spacing for Superior Lithium and Sodium Storage**

Haiyan Wang,<sup>[a]</sup> Hao Jiang,<sup>[a]\*</sup> Yanjie Hu,<sup>[a]</sup> Neng Li,<sup>[b]\*</sup> Xiujian Zhao,<sup>[b]</sup> Chunzhong Li<sup>[a]\*</sup>

<sup>[a]</sup> Key Laboratory for Ultrafine Materials of Ministry of Education, School of Materials Science and Engineering, East China University of Science and Technology, Shanghai 200237, China

<sup>[b]</sup> State Key Laboratory of Silicate Materials for Architectures, Wuhan University of Technology, Wuhan, 430070, China

\* Corresponding author: Tel.: +86-21-64250949, Fax: +86-21-64250624

E-mail: [jianghao@ecust.edu.cn](mailto:jianghao@ecust.edu.cn) (Prof. H. Jiang), [lineng@whut.edu.cn](mailto:lineng@whut.edu.cn) (Prof. N. Li) and

[czli@ecust.edu.cn](mailto:czli@ecust.edu.cn) (Prof. C. Z. Li)

## 1. Figures

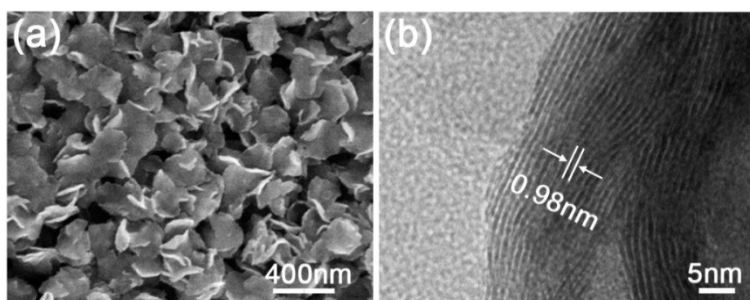

**Fig. S1** (a) SEM and (b) TEM images of the MoS<sub>2</sub>/OA nanosheets.

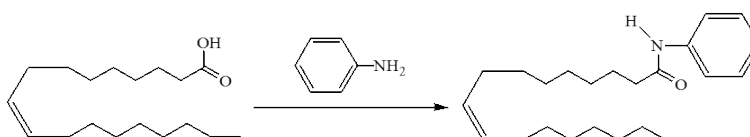

**Fig. S2** The amidation reaction equation of OA and aniline.

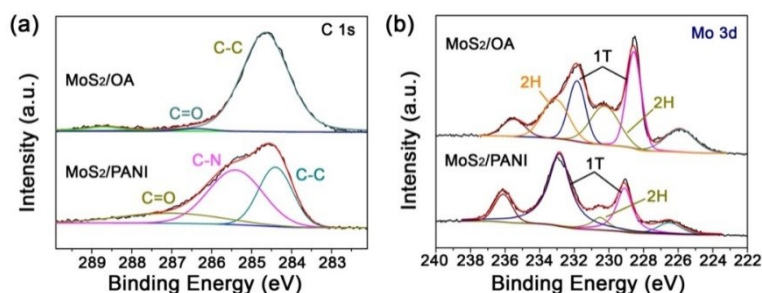

**Fig. S3** XPS spectra of MoS<sub>2</sub>/OA and MoS<sub>2</sub>/PANI for (a) C and (b) Mo. As depicted, after the reaction with PANI, the peak corresponding to C=O at 286.4 eV shifts to 287 eV, conforming the amidation process between oleic acid and aniline. For Mo 3d spectra, the MoS<sub>2</sub>-OA shows large double peaks at 228.6 eV (3d<sub>5/2</sub>) and 231.8 eV (3d<sub>3/2</sub>) and small double peaks at 230.2 eV (3d<sub>5/2</sub>) and 233.1 eV (3d<sub>3/2</sub>) as an evidence for the formation of MoS<sub>2</sub> consisting of the 1T and 2H phases. As for MoS<sub>2</sub>/PANI, the peaks indicate an increasing of 1T phase and a decreasing of 2H phase of MoS<sub>2</sub>, suggesting a nearly monolayer MoS<sub>2</sub> nanosheet, which is mainly benefit form the PANI layer in the MoS<sub>2</sub> interlayer effectivley avoiding their stacking/restacking. The peak Mo<sup>6+</sup> 3d<sub>5/2</sub> at 235.5 eV emerges because of partial oxidation during fabrication process. Moreover, both C and Mo peaks show a slight shift to high energy regions, indicating an electronic interaction between MoS<sub>2</sub> and PANI.

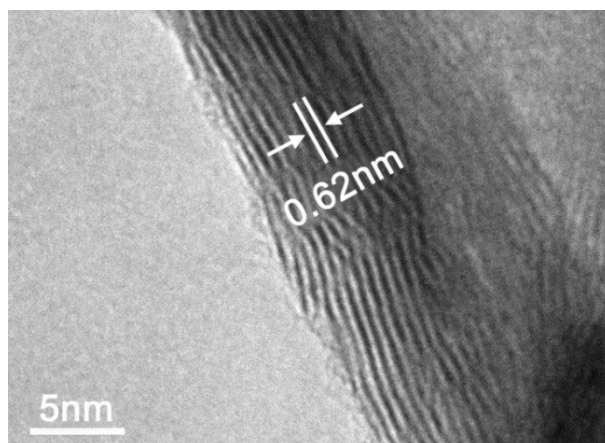

**Fig. S4** TEM image of the annealed MoS<sub>2</sub> nanosheets.

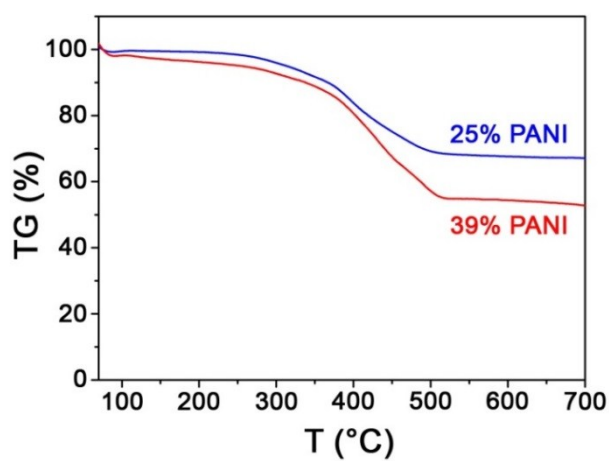

**Fig. S5** TG curves of the MoS<sub>2</sub>/PANI hybrids with different PANI content.

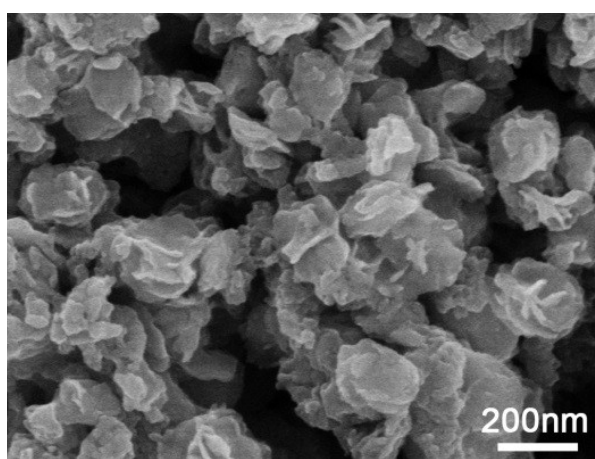

**Fig. S6** SEM image of the MoS<sub>2</sub>/PANI hybrids with 39% PANI content.

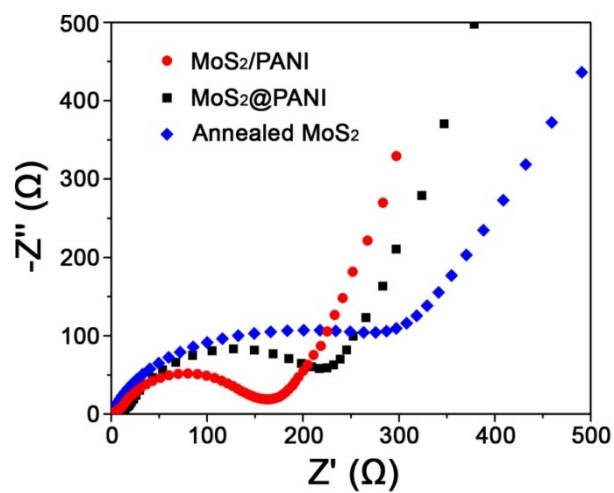

**Fig. S7** Nyquist plots of the MoS<sub>2</sub>/PANI hybrids, the MoS<sub>2</sub>@PANI hybrids and the annealed MoS<sub>2</sub> nanosheets in LIBs.

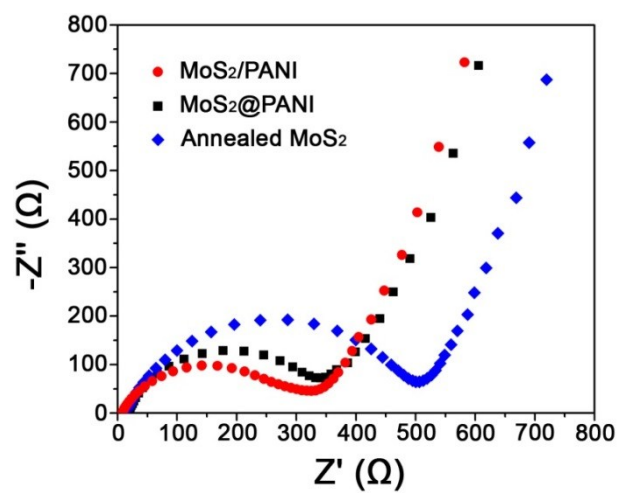

**Fig. S8** Nyquist plots of the MoS<sub>2</sub>/PANI hybrids, the MoS<sub>2</sub>@PANI hybrids and the annealed MoS<sub>2</sub> nanosheets in SIBs.

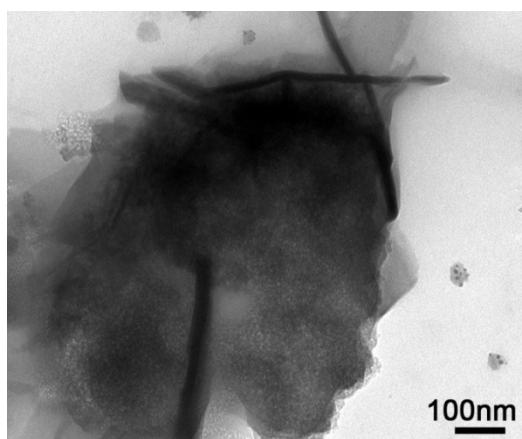

**Fig. S9** TEM image of the 2D MoS<sub>2</sub>/PANI nanosheets after 100 cycles in LIBs.

## 2. Tables

**Table S1.** Comparison of LIBs performances of MoS<sub>2</sub>-based anode materials.

| <b>Materials</b>                                               | <b>Interlayer spacing</b> | <b>LIBs performance</b>                                                                                                        | <b>Ref.</b> |
|----------------------------------------------------------------|---------------------------|--------------------------------------------------------------------------------------------------------------------------------|-------------|
| Mesoporous MoS <sub>2</sub>                                    | 0.66 nm                   | 903, 845, 795 and 748 mAh g <sup>-1</sup> at 100, 500, 1000 and 2000 mA g <sup>-1</sup>                                        | [1]         |
| MoS <sub>2</sub> nanoplates                                    | 0.69 nm                   | 912 mAh g <sup>-1</sup> at 1062 mA g <sup>-1</sup>                                                                             | [1]         |
| 3D hierarchical MoS <sub>2</sub> /polyaniline                  | 0.64 nm                   | 798 mA h g <sup>-1</sup> at 100 mA g <sup>-1</sup> , 439 mA h g <sup>-1</sup> at 1000 mA g <sup>-1</sup>                       | [3]         |
| MoS <sub>2</sub> /polyaniline nanowires                        | 0.61 nm                   | 1006 at 200 mA g <sup>-1</sup> , 320 mA h g <sup>-1</sup> at 1000 mA g <sup>-1</sup>                                           | [4]         |
| MoS <sub>2</sub> @C nanotubes                                  | 0.64 nm                   | 1326.9, 1074.2, 993.1, and 929 mA h g <sup>-1</sup> at 100, 500, 1000, and 2000 mA g <sup>-1</sup>                             | [5]         |
| MoS <sub>2</sub> nanoplates                                    | Single-layer              | 1095, 986 mAh g <sup>-1</sup> at 500, 1000 mA g <sup>-1</sup>                                                                  | [6]         |
| 3D MoS <sub>2</sub> @Fe <sub>3</sub> O <sub>4</sub> nanohybrid | Single-layer              | 1183, 1019 and 910 mA h g <sup>-1</sup> at 100, 500 and 1000 mA g <sup>-1</sup>                                                | [7]         |
| MoS <sub>2</sub> @CMK-3                                        | 0.65 nm                   | 893, 773, 713 and 591 mAh g <sup>-1</sup> at 100, 500, 1000 and 2000 mA g <sup>-1</sup>                                        | [8]         |
| 3D MoS <sub>2</sub> @porous carbon nanosheet                   | 0.65 nm                   | 1060, 950, 880 and 710 mA h g <sup>-1</sup> at 200, 500, 1000 and 2000 mA g <sup>-1</sup>                                      | [9]         |
| 3D MoS <sub>2</sub> nanospheres                                | 0.71 nm                   | 1184.8, 882.7, 601.5, and 353.6 mAh g <sup>-1</sup> at 100, 500, 1000 and 2000 mA g <sup>-1</sup>                              | [10]        |
| PANI/MoS <sub>2</sub> hybrids                                  | 1.08 nm                   | 1319, 1285, 1247, 1152, 1077, 1029 and 885 mA h g <sup>-1</sup> at 100, 200, 500, 1000, 1500, 2000 and 4000 mA g <sup>-1</sup> | This work   |

**Table S2.** Comparison of SIBs performance of MoS<sub>2</sub>-based anode materials.

| <b>Materials</b>                                    | <b>Interlayer spacing</b> | <b>SIBs performance</b>                                                                                                                                            | <b>Ref.</b> |
|-----------------------------------------------------|---------------------------|--------------------------------------------------------------------------------------------------------------------------------------------------------------------|-------------|
| MoS <sub>2</sub> @C nanotubes                       | 0.64 nm                   | 610, 560, 430 mA h g <sup>-1</sup> at 50, 100 and 1000 mA g <sup>-1</sup>                                                                                          | [5]         |
| MoS <sub>2</sub> nanoplates                         | Singlelayer               | 854, 623 mA h g <sup>-1</sup> at 100 and 1000 mA g <sup>-1</sup>                                                                                                   | [6]         |
| TiO <sub>2</sub> -B/MoS <sub>2</sub> nanowires      | 0.64 nm                   | 214 mA h g <sup>-1</sup> at 20 mA g <sup>-1</sup> , 173 mA h g <sup>-1</sup> at 100 mA g <sup>-1</sup> , 77 mA h g <sup>-1</sup> at 1000 mA g <sup>-1</sup>        | [11]        |
| Exfoliated MoS <sub>2</sub> nanosheets              | 0.638 nm                  | 500 mA h g <sup>-1</sup> , 305 mA h g <sup>-1</sup> at 40 mA g <sup>-1</sup> , 320 mA g <sup>-1</sup>                                                              | [12]        |
| 3D MoS <sub>2</sub> -graphene microspheres          | 0.69 nm                   | 427 mA h g <sup>-1</sup> at 1000 mA g <sup>-1</sup>                                                                                                                | [13]        |
| MoS <sub>2</sub> /C nanofibers                      | 0.64 nm                   | 400.6 mA h g <sup>-1</sup> at 50 mA g <sup>-1</sup> , 369.7 mA h g <sup>-1</sup> at 100 mA g <sup>-1</sup> , 246.5 mA h g <sup>-1</sup> at 1000 mA g <sup>-1</sup> | [14]        |
| MoS <sub>2</sub> /C nanospheres                     | Not Mentioned             | 520 mA h g <sup>-1</sup> at 67 mA g <sup>-1</sup> , 390 mA h g <sup>-1</sup> at 1340 mA g <sup>-1</sup>                                                            | [15]        |
| MoS <sub>2</sub> @C paper                           | 0.62 nm                   | 446, 205 mA h g <sup>-1</sup> at 20, 1000 mA g <sup>-1</sup>                                                                                                       | [16]        |
| HfO <sub>2</sub> -coated MoS <sub>2</sub> nanosheet | 0.62 nm                   | 613 mAh g <sup>-1</sup> at 100 mA g <sup>-1</sup> , 347 mAh g <sup>-1</sup> at 1000 mA g <sup>-1</sup>                                                             | [17]        |
| MoS <sub>2</sub> nanoflowers                        | 0.69 nm                   | 200 mAh g <sup>-1</sup> at 1000 mA g <sup>-1</sup>                                                                                                                 | [18]        |
| PANI/MoS <sub>2</sub> hybrids                       | 1.08 nm                   | 734, 634, 584, 510, 465 and 391 mA h g <sup>-1</sup> at 20, 50, 100, 300, 600 and 1000 mA g <sup>-1</sup>                                                          | This work   |

### 3. References

1. H. Liu, D. Su, R. Zhou, B. Sun, G. Wang, S. Qiao, *Adv. Energy Mater.*, 2012, **2**, 970–975.
2. H. Hwang, H. Kim, J. Cho, *Nano Lett.*, 2011, **11**, 4826–4830.
3. L. Hu, Y. Ren, H. Yang, Q. Xu, *ACS Appl. Mater. Interfaces*, 2014, **6**, 14644–14652.
4. L. Yang, S. Wang, J. Mao, J. Deng, Q. Gao, Y. Tang, O. G. Schmidt, *Adv. Mater.*, 2013, **25**, 1180–1184.
5. X. Zhang, X. Li, J. Liang, Y. Zhu, Y. Qian, *Small*, 2016, **12**, 2484–2491.
6. C. Zhu, X. Mu, P. A. van Aken, Y. Yu, J. Maier, *Angew. Chem. Int. Ed.*, 2014, **53**, 2152–2156.
7. X. Zhu, K. Wang, D. Yan, S. Le, R. Ma, K. Sun, Y. Liu, *Chem. Commun.*, 2015, **51**, 11888–11891.
8. X. Xu, Z. Fan, X. Yu, S. Ding, D. Yu, X. Lou, *Adv. Energy Mater.*, 2014, **4**, 1400902.
9. J. Zhou, J. Qin, X. Zhang, C. Shi, E. Liu, J. Li, N. Zhao, C. He, *ACS Nano*, 2015, **9**, 3837–3848.
10. S. Zhang, B. Chowdari, Z. Wen, J. Jin, J. Yang, *ACS Nano*, 2015, **12**, 12464–12472.
11. J. Liao, B. D. Luna, A. Manthiram, *J. Mater. Chem. A*, 2016, **4**, 801–806.
12. D. Su, S. Dou, G. Wang, *Adv. Energy Mater.*, 2014, **5**, 1401205.
13. S. H. Choi, Y. N. Ko, J. Lee, Y. C. Kang, *Adv. Funct. Mater.*, 2015, **25**, 1780–1788.
14. X. Xiong, W. Luo, X. Hu, C. Chen, L. Qie, D. Hou, Y. Huang, *Sci. Rep.*, 2015, **5**, 9254.
15. J. Wang, C. Luo, T. Gao, A. Langrock, A. C. Mignerey, C. Wang, *Small*, 2015, **11**, 473–481.
16. X. Xie, T. Makaryan, M. Zhao, K. L. Van Aken, Y. Gogotsi, G. Wang, *Adv. Energy Mater.*, 2016, **6**, 1502161.
17. B. Ahmed, D. H. Anjum, M. N. Hedhili, H. N. Alshareef, *Small*, 2015, **11**, 4341–4350.
18. Z. Hu, L. Wang, K. Zhang, J. Wang, F. Cheng, Z. Tao, J. Chen, *Angew. Chem.*, 2014, **126**, 13008–13012.

**Movies S1-S4.**
